# Supplementary material
Source: PubMed Central journal article supplement (PMC3233484)
Supplement: cc0924_4931SD1.pdf [file cc0924_4931SD1.pdf]

Supplemental Figure 1

A

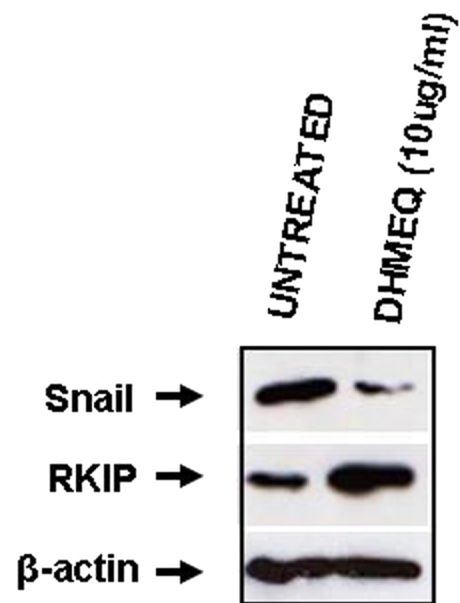

B

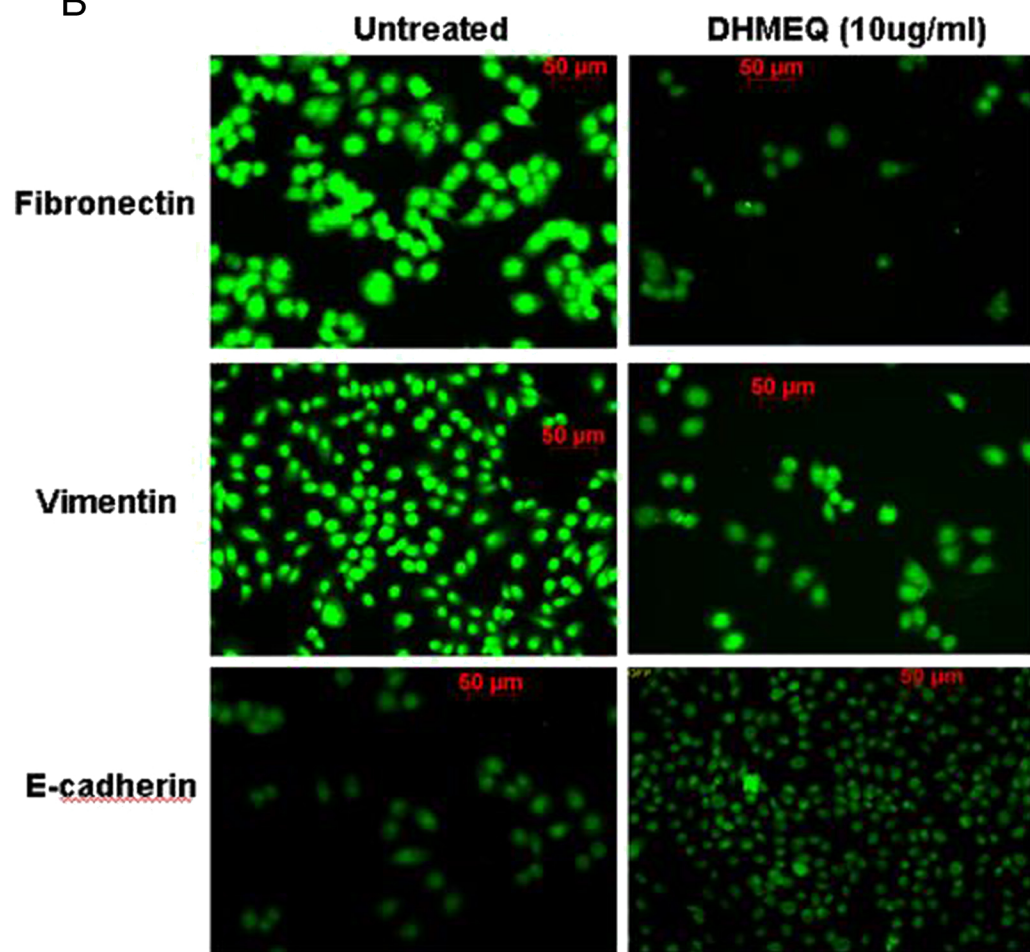

## **Supplemental Figure 1**

### **DHMEQ mimics DETANONOate in the inhibition of Snail, upregulation of RKIP and reversal of the EMT phenotype**

(A) The specific NF- $\kappa$ B inhibitor, DHMEQ, inhibits Snail expression and upregulates RKIP in DU145 cells. The cells were treated for 4 h with 10ug/ml DHMEQ and subjected to western blot analysis for monitoring RKIP and Snail expression.  $\beta$ -actin was used as an internal control. (B) NF- $\kappa$ B inhibition by DHMEQ reverses the mesenchymal phenotype of DU145 cells. Cells were treated with 10ug/ml DHMEQ and analyzed for fibronectin, vimentin and E-cadherin expression by immunofluorescence.
